# Supplementary material for: Synthesis of a Stable Primary-Alkyl-Substituted Selenenyl Iodide and Its Hydrolytic Conversion to the Corresponding Selenenic Acid
Source: MDPI journal article supplement (doi:10.3390/molecules201219773), 2015-12-02
Supplement: s1 [file s1]

# Supplementary Materials: Synthesis of a Stable Primary-Alkyl-Substituted Selenenyl Iodide and Its Hydrolytic Conversion to the Corresponding Selenenic Acid

Shohei Sase, Ryo Kakimoto, Ryutaro Kimura and Kei Goto

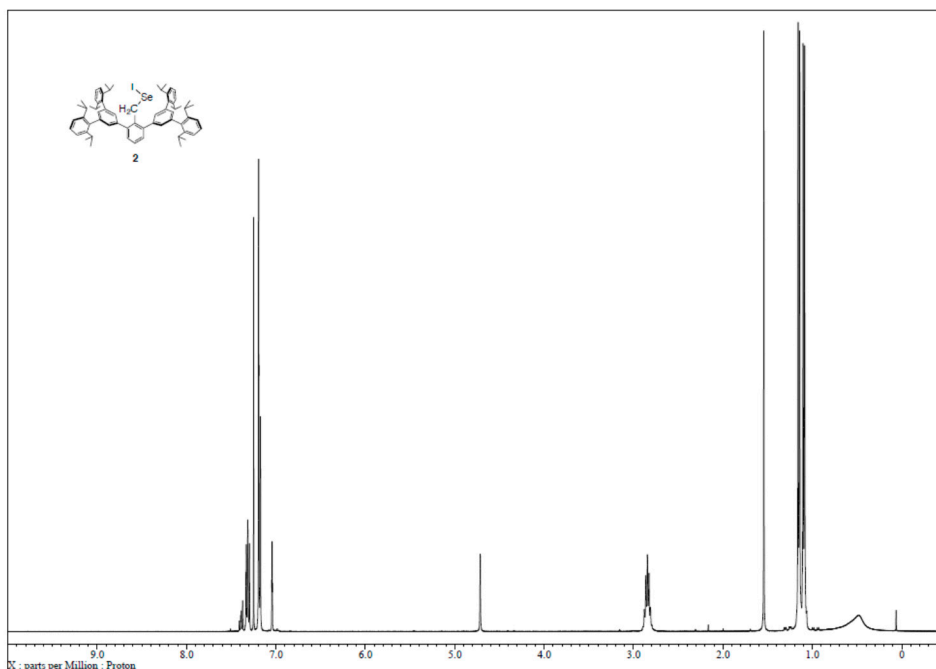

Figure S1. <sup>1</sup>H-NMR spectrum of compound 2 in CDCl<sub>3</sub>.

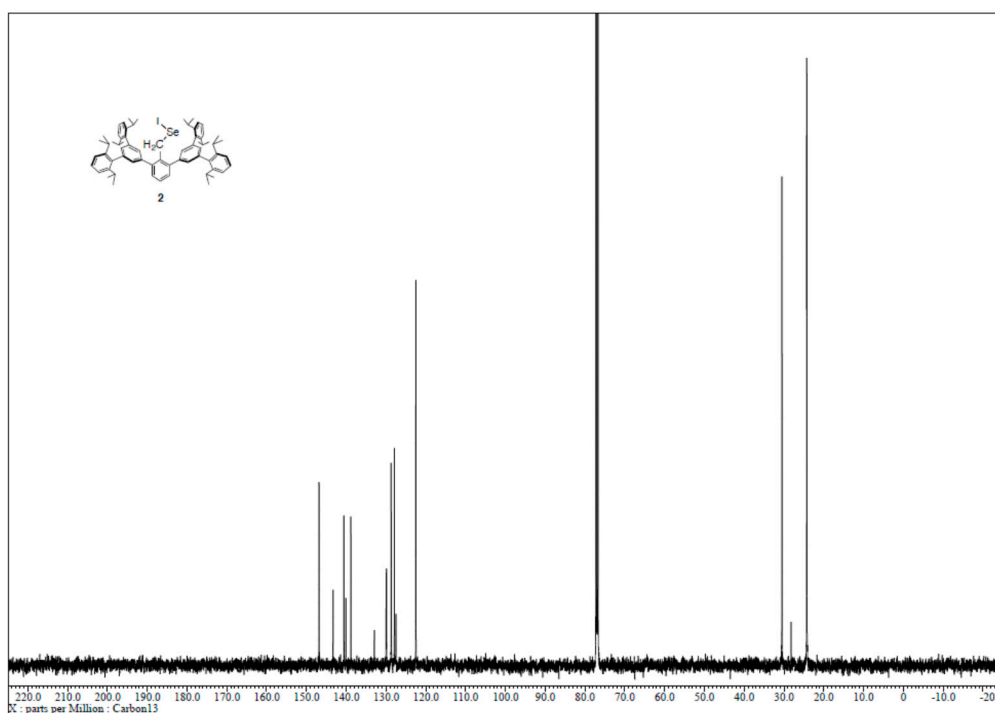

Figure S2. <sup>13</sup>C-NMR spectrum of compound 2 in CDCl<sub>3</sub>.
